# Supplementary material
Source: MDPI journal article supplement (https://www.mdpi.com/2077-0472/13/6/1152)
Supplement: s1 [file s1]

**Table S1.** Agrophysical and agrochemical soil properties

| Soil depth, cm | Sand, 0,05-2,0 mm | Silt, 0,002-0,05 mm | Clay, < 0,002 mm | C <sub>org</sub> , % | pH  | Soil density, kg/m <sup>3</sup> | CEC, meq/100 g | P <sub>2</sub> O <sub>5</sub> , mg/kg | K <sub>2</sub> O, mg/kg |
|----------------|-------------------|---------------------|------------------|----------------------|-----|---------------------------------|----------------|---------------------------------------|-------------------------|
| 0-25           | 13                | 75                  | 12               | 2,7                  | 6,0 | 1200                            | 49,0           | 45,9                                  | 324                     |
| 25-50          | 11                | 78                  | 11               | 1,5                  | 5,5 | 1400                            | 36,3           | 14,6                                  | 168                     |

**Table S2.** Main properties and toxicity of herbicides

| Pesticide          | Property/<br>Terrestrial ecotoxicology | Value                                                    | Interpretation                            |
|--------------------|----------------------------------------|----------------------------------------------------------|-------------------------------------------|
| Haloxypop-P-methyl | Soil degradation                       | DT <sub>50</sub> (typical) = 0,5 days                    | Non-persistent                            |
|                    | Soil adsorption                        | -                                                        | No data for ester due to rapid hydrolysis |
|                    | Mammals                                | LD <sub>50</sub> >300 mg kg <sup>-1</sup>                | Moderate                                  |
|                    |                                        | -                                                        | -                                         |
|                    | Birds                                  | LD <sub>50</sub> = 1159 mg kg <sup>-1</sup>              | Moderate                                  |
|                    |                                        | -                                                        | -                                         |
|                    | Honeybees                              | Contact acute LD <sub>50</sub> >100 µg bee <sup>-1</sup> | Low                                       |
|                    |                                        | Oral acute LD <sub>50</sub> >100 µg bee <sup>-1</sup>    | Low                                       |
| Imazamox           | Soil degradation                       | DT <sub>50</sub> (typical) = 200,2 days                  | Persistent                                |
|                    | Soil adsorption                        | K <sub>oc</sub> = 11,6                                   | Very mobile                               |
|                    | Mammals                                | LD <sub>50</sub> > 5000 mg kg <sup>-1</sup>              | Low                                       |
|                    |                                        | NOAEL>1469 mg kg <sup>-1</sup>                           | Low                                       |
|                    | Birds                                  | LD <sub>50</sub> > 1846 mg kg <sup>-1</sup>              | Moderate                                  |
|                    |                                        | NOEL=209,4 mg kg <sup>-1</sup>                           | Low                                       |
|                    | Honeybees                              | Contact acute LD <sub>50</sub> >58 µg bee <sup>-1</sup>  | Moderate                                  |
|                    |                                        | Oral acute LD <sub>50</sub> > 40 µg bee <sup>-1</sup>    | Moderate                                  |
| Imazethapyr        | Soil degradation                       | DT <sub>50</sub> (typical) = 90 days                     | Moderately persistent                     |
|                    | Soil adsorption                        | K <sub>oc</sub> = 52                                     | Mobile                                    |
|                    | Mammals                                | LD <sub>50</sub> >5000 mg kg <sup>-1</sup>               | Low                                       |
|                    |                                        | NOEL=818 mg kg <sup>-1</sup>                             | Moderate                                  |
|                    | Birds                                  | LD <sub>50</sub> >2150 mg kg <sup>-1</sup>               | Low                                       |
|                    |                                        | -                                                        | -                                         |
|                    | Honeybees                              | Contact acute LD <sub>50</sub> >100 µg bee <sup>-1</sup> | Low                                       |
|                    |                                        | Oral acute LD <sub>50</sub> >24,6 µg bee <sup>-1</sup>   | Moderate                                  |
| Fluazifop-P-butyl  | Soil degradation                       | DT <sub>50</sub> (typical) = 1 day                       | Non-persistent                            |
|                    | Soil adsorption                        | K <sub>oc</sub> = 3394                                   | Slightly mobile                           |
|                    | Mammals                                | LD <sub>50</sub> =2451 mg kg <sup>-1</sup>               | Low                                       |
|                    |                                        | NOAEL=6,72 mg kg <sup>-1</sup>                           | High                                      |
|                    | Birds                                  | LD <sub>50</sub> >3960 mg kg <sup>-1</sup>               | Low                                       |
|                    |                                        | NOEL=86,8                                                | Moderate                                  |
|                    | Honeybees                              | Contact acute LD <sub>50</sub> >200 µg bee <sup>-1</sup> | Low                                       |
|                    |                                        | Oral acute LD <sub>50</sub> >200 µg bee <sup>-1</sup>    | Low                                       |
| Desmedipham        | Soil degradation                       | DT <sub>50</sub> (typical) = 52 days                     | Moderately                                |

|              |                  |                                                             |                 |
|--------------|------------------|-------------------------------------------------------------|-----------------|
|              |                  |                                                             | persistent      |
|              | Soil adsorption  | $K_{foc} = 4124$                                            | Non-mobile      |
|              | Mammals          | $LD_{50} > 2000 \text{ mg kg}^{-1}$                         | Low             |
|              |                  | $NOEL = 3 \text{ mg kg}^{-1}$                               | High            |
|              | Birds            | $LD_{50} > 2000 \text{ mg kg}^{-1}$                         | Low             |
|              |                  | $NOEL = 11 \text{ mg kg}^{-1}$                              | Moderate        |
|              | Honeybees        | Contact acute $LD_{50} > 200 \text{ } \mu\text{g bee}^{-1}$ | Low             |
|              |                  | Oral acute $LD_{50} > 100,6 \text{ } \mu\text{g bee}^{-1}$  | Low             |
| Phenmedipham | Soil degradation | $DT_{50} \text{ (typical)} = 12 \text{ days}$               | Non-persistent  |
|              | Soil adsorption  | $K_{foc} = 1775$                                            | Slightly mobile |
|              | Mammals          | $LD_{50} > 5000 \text{ mg kg}^{-1}$                         | Low             |
|              |                  | $NOAEL = 225 \text{ mg kg}^{-1}$                            | Low             |
|              | Birds            | $LD_{50} > 2500 \text{ mg kg}^{-1}$                         | Low             |
|              |                  | $NOEL = 121 \text{ mg kg}^{-1}$                             | Moderate        |
|              | Honeybees        | Contact acute $LD_{50} > 100 \text{ } \mu\text{g bee}^{-1}$ | Low             |
|              |                  | Oral acute $LD_{50} > 104,8 \text{ } \mu\text{g bee}^{-1}$  | Low             |

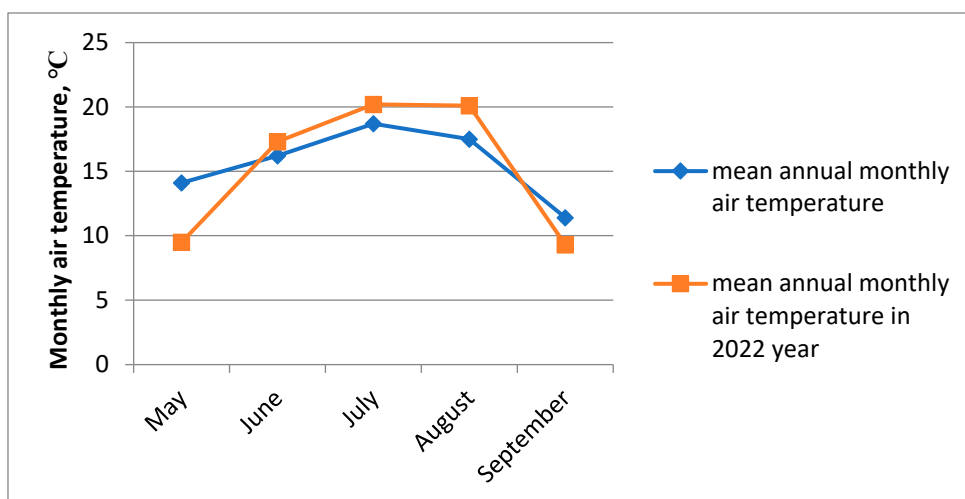

Figure S1. Mean monthly air temperature, °C

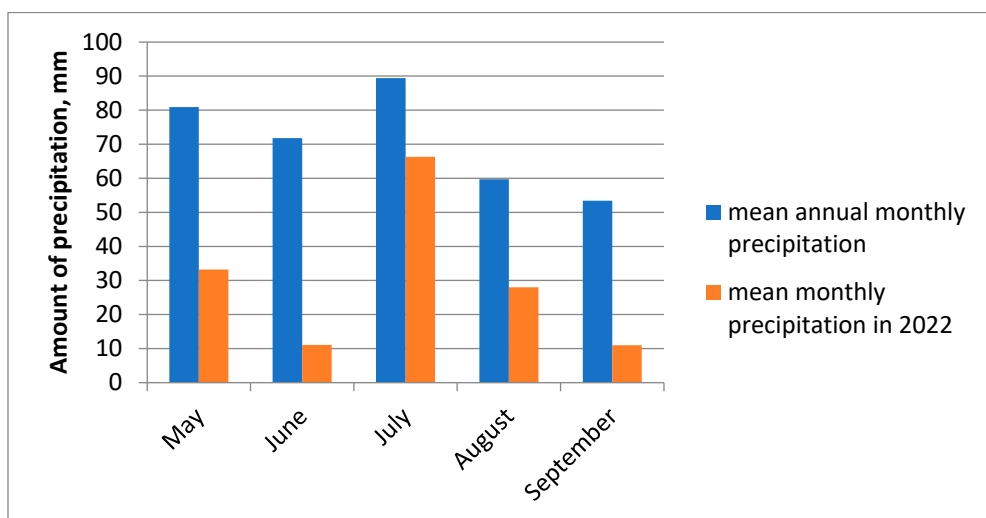

Figure S2. Amount of precipitation, mm.

**Table S3.** The herbicides completeness from chicory roots samples.

| fortification level,<br>mg/kg | extraction efficiency,<br>%          | average extraction<br>efficiency (n=5), % | standard deviation<br>(n=5), % |
|-------------------------------|--------------------------------------|-------------------------------------------|--------------------------------|
| Imazamox                      |                                      |                                           |                                |
| 0,08                          | 96,3<br>95,2<br>97,0<br>95,3<br>93,6 | 95,5                                      | 1,3                            |
| 0,008                         | 97,3<br>96,5<br>94,3<br>97,8<br>90,6 | 95,3                                      | 2,9                            |
| Haloxifop-P-methyl            |                                      |                                           |                                |
| 0,16                          | 94,6<br>91,5<br>89,6<br>91,4<br>96,4 | 92,7                                      | 2,7                            |
| 0,016                         | 97,1<br>95,0<br>93,4<br>92,6<br>94,3 | 94,5                                      | 1,7                            |
| Fluazifop-P-butyl             |                                      |                                           |                                |
| 0,16                          | 92,3<br>94,3<br>90,6<br>91,9<br>95,3 | 92,9                                      | 1,9                            |
| 0,016                         | 94,2<br>92,2<br>97,3<br>91,3<br>92,3 | 93,5                                      | 2,4                            |
| Phenmedipham                  |                                      |                                           |                                |
| 0,32                          | 87,3<br>85,2<br>91,6<br>98,3<br>94,2 | 91,3                                      | 5,3                            |
| 0,032                         | 83,6<br>84,5<br>87,2<br>83,2<br>81,3 | 84,0                                      | 2,2                            |
| Desmedifam                    |                                      |                                           |                                |
| 0,32                          | 82,1<br>86,3<br>84,5<br>83,6<br>82,2 | 83,7                                      | 1,7                            |

|       |                                      |      |     |
|-------|--------------------------------------|------|-----|
| 0,032 | 86,3<br>80,6<br>82,1<br>84,5<br>83,3 | 83,4 | 2,2 |
|-------|--------------------------------------|------|-----|
